# Supplementary figures and images for: Universal cell membrane camouflaged nano-prodrugs with right-side-out orientation adapting for positive pathological vascular remodeling in atherosclerosis
Source: Royal Society of Chemistry journal article supplement (doi:10.1039/d4sc00761a), 2024-01-01

Positive control

Negative control

ETB

EM-ETBPD

OEM-ETBPD

EM-ETBNPs

OEM-ETBNPs

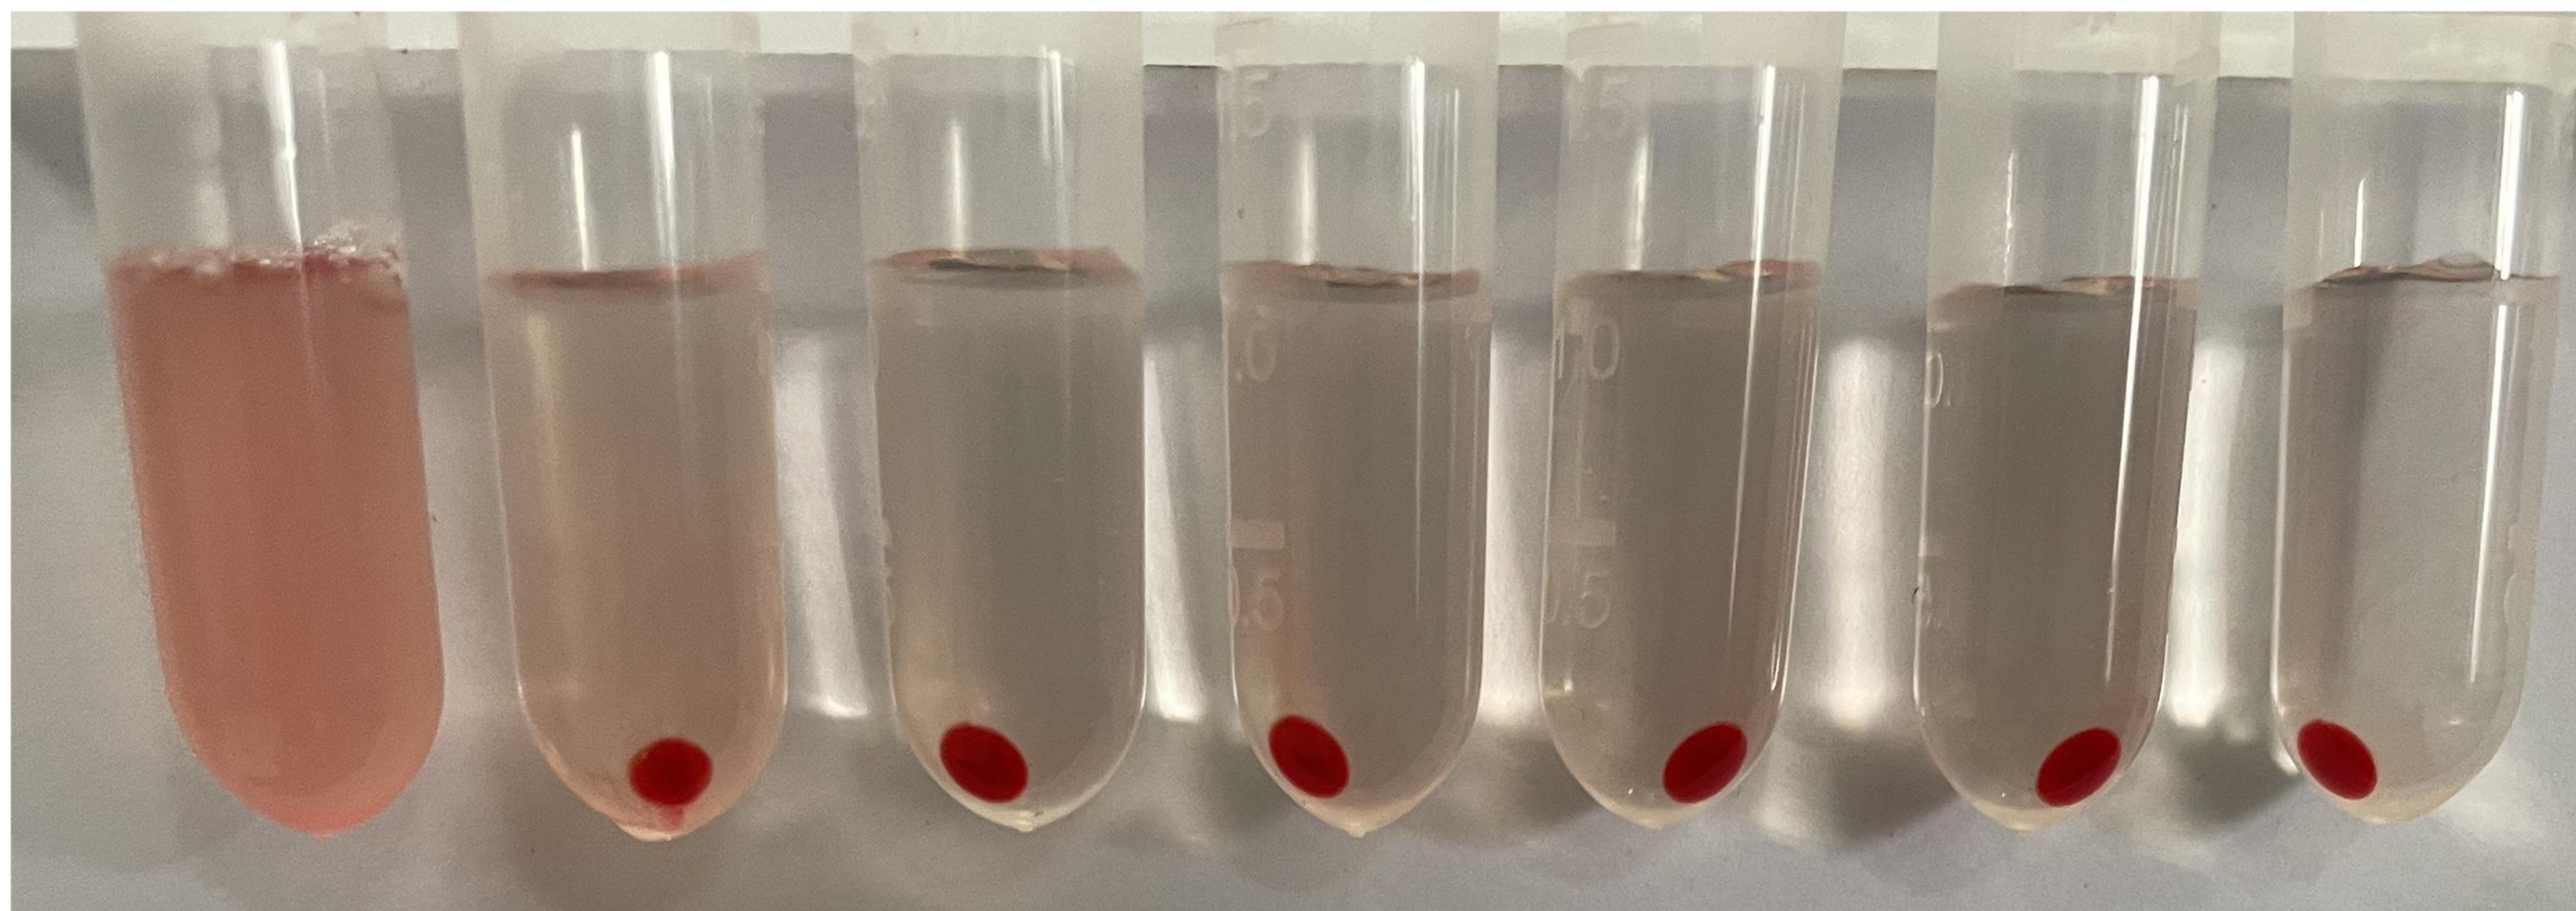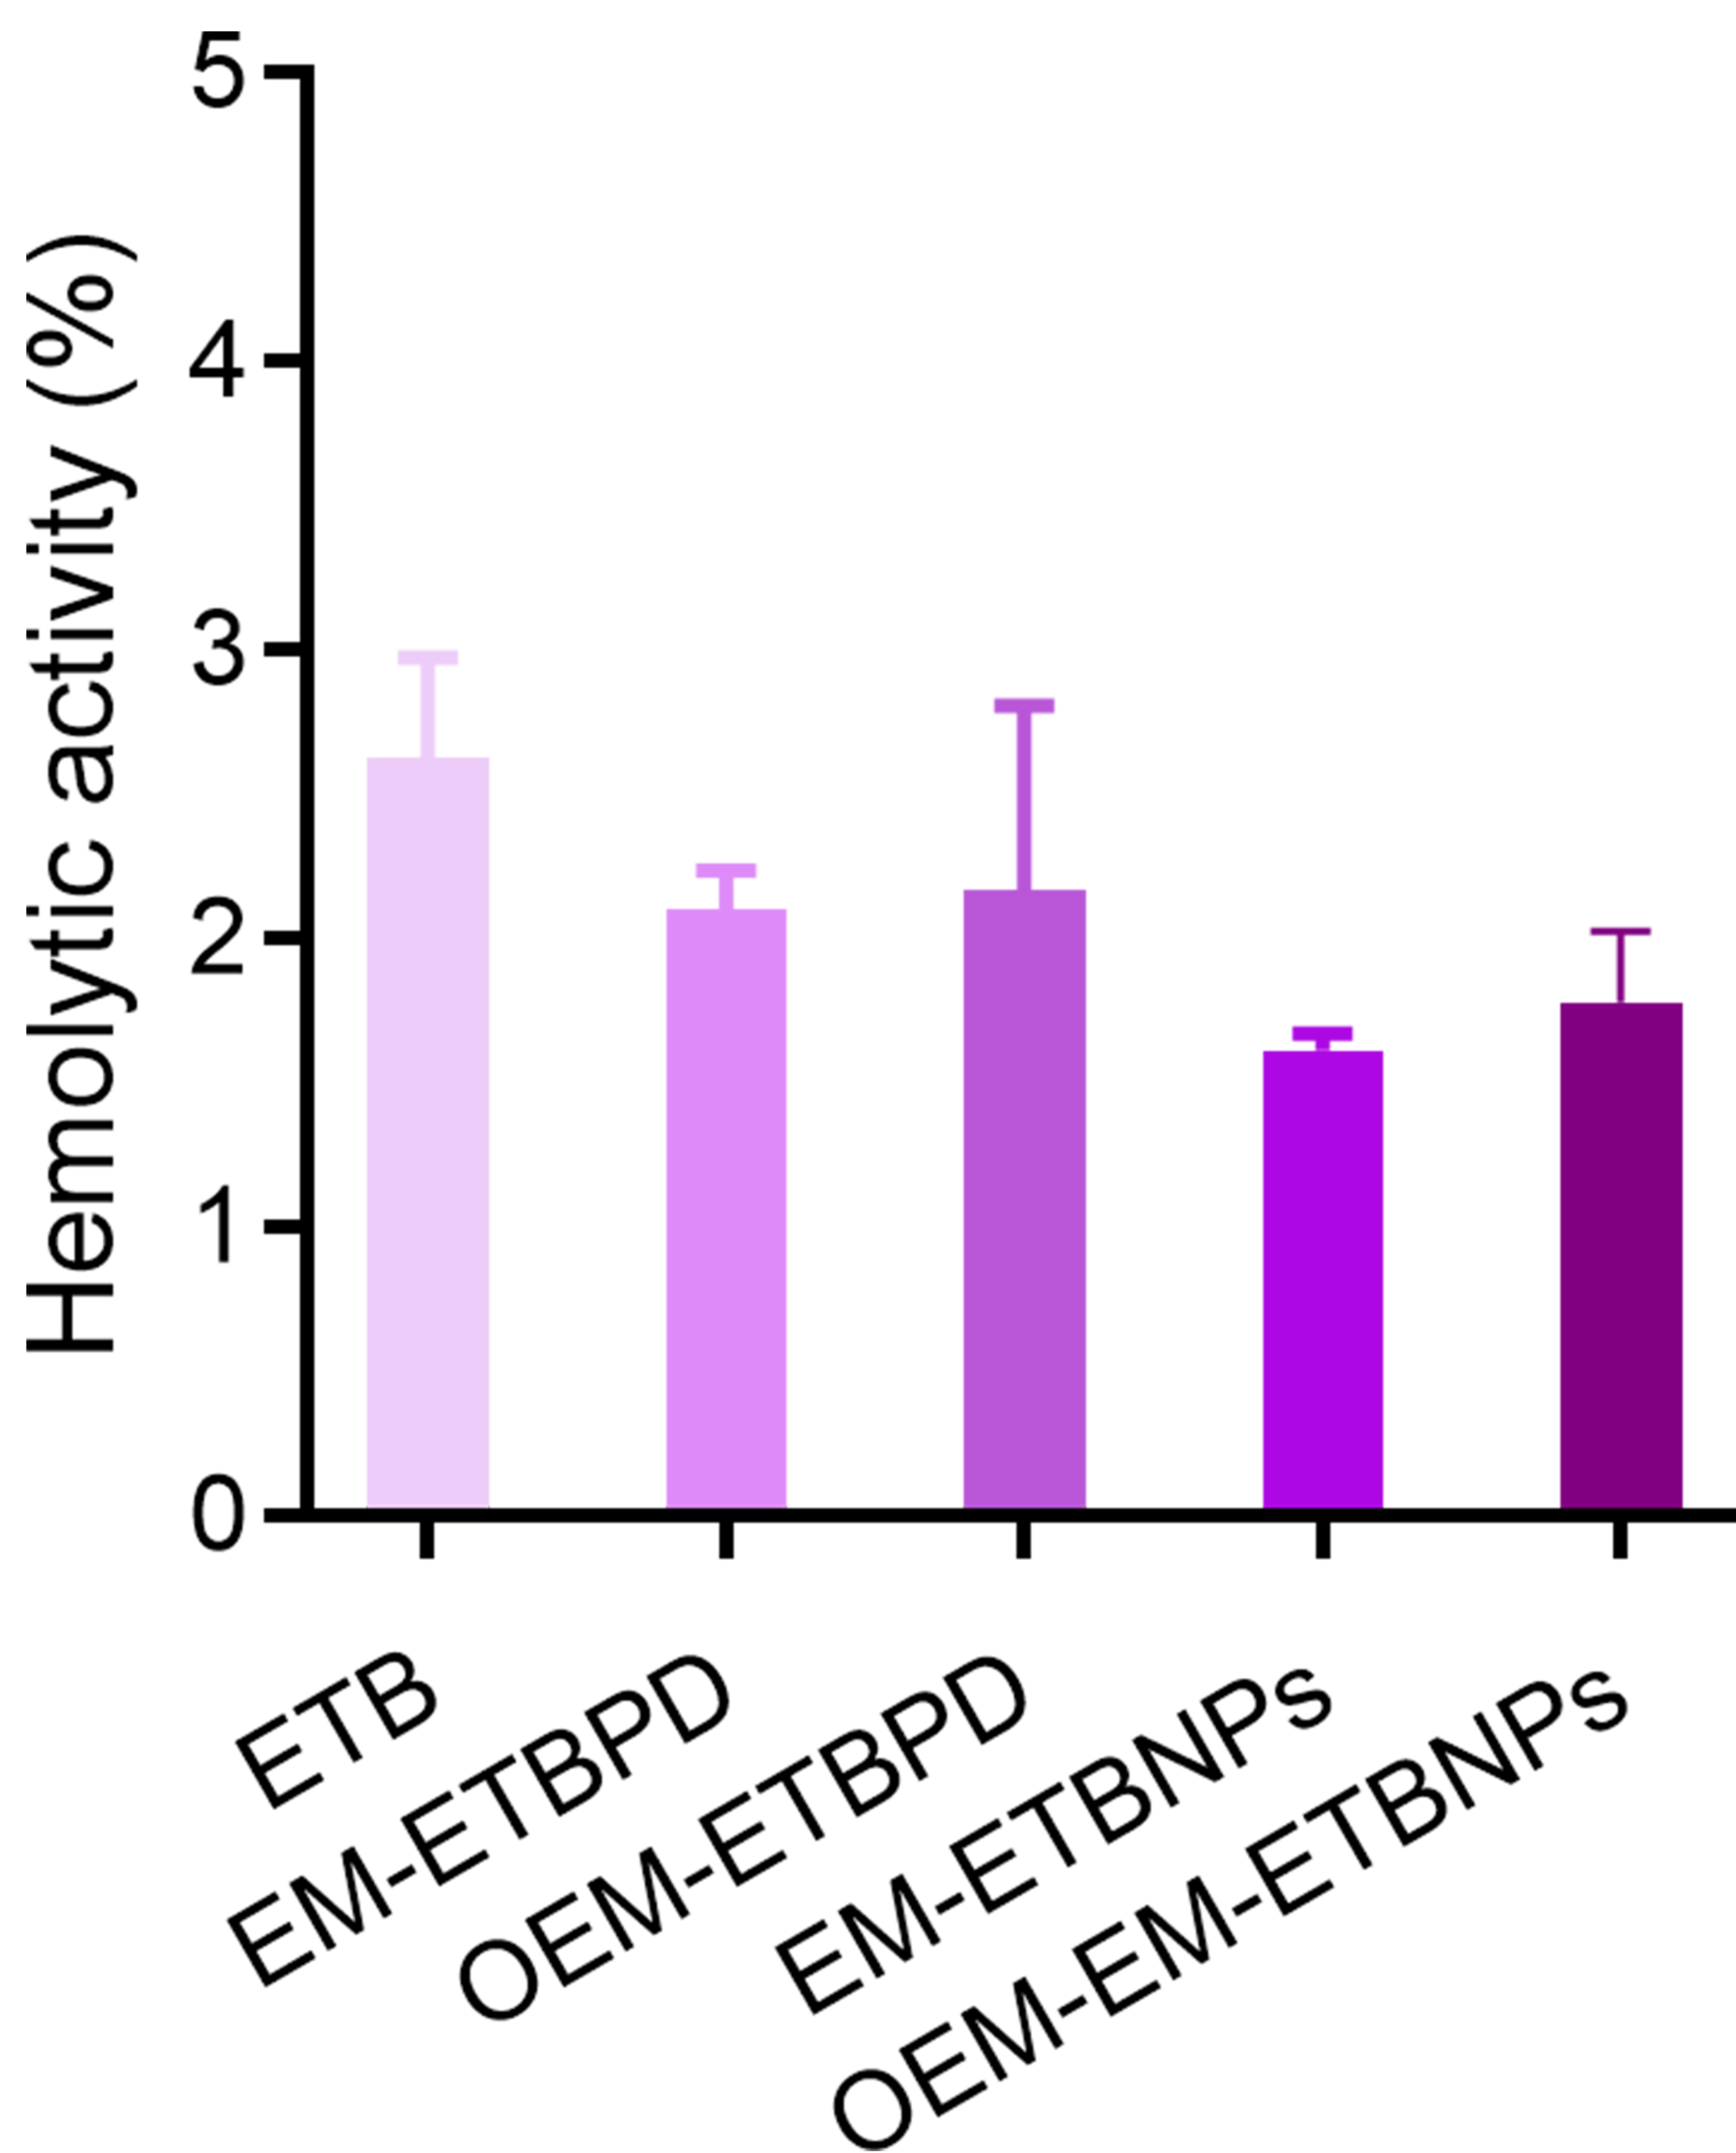

Supplement: d4sc00761a11.pdf [file d4sc00761a11.pdf]

# DAPI/Lysosome

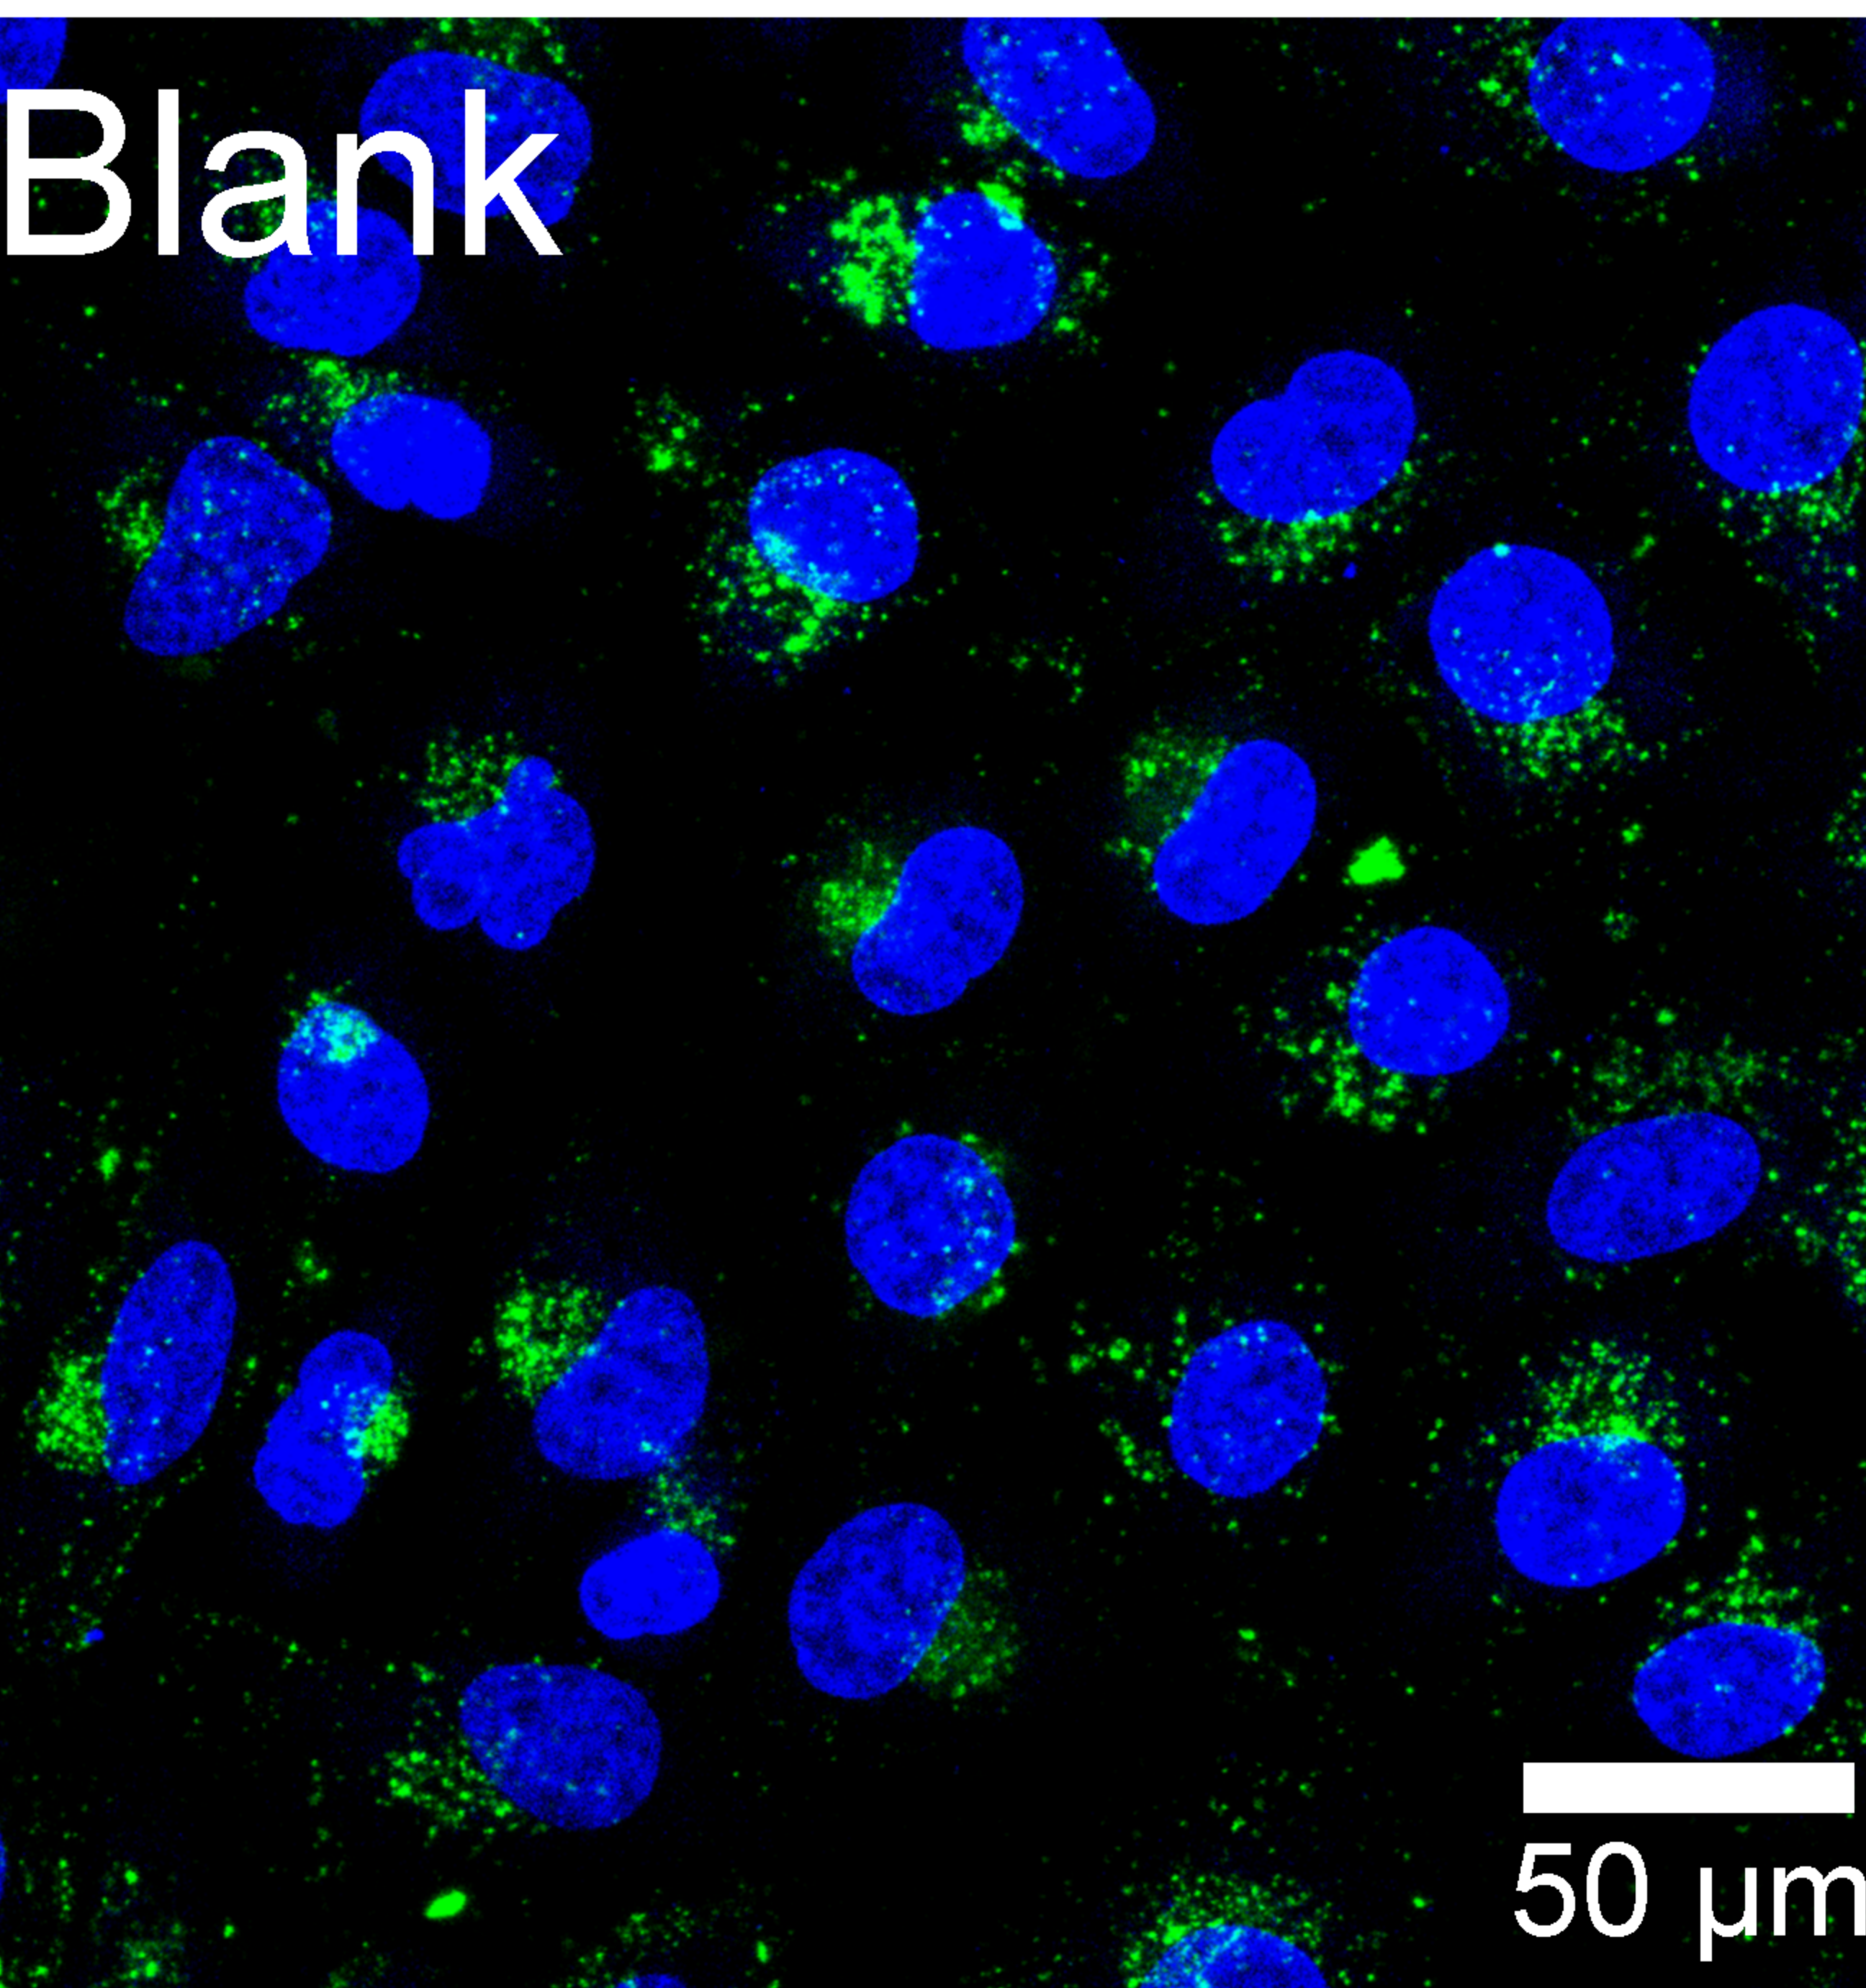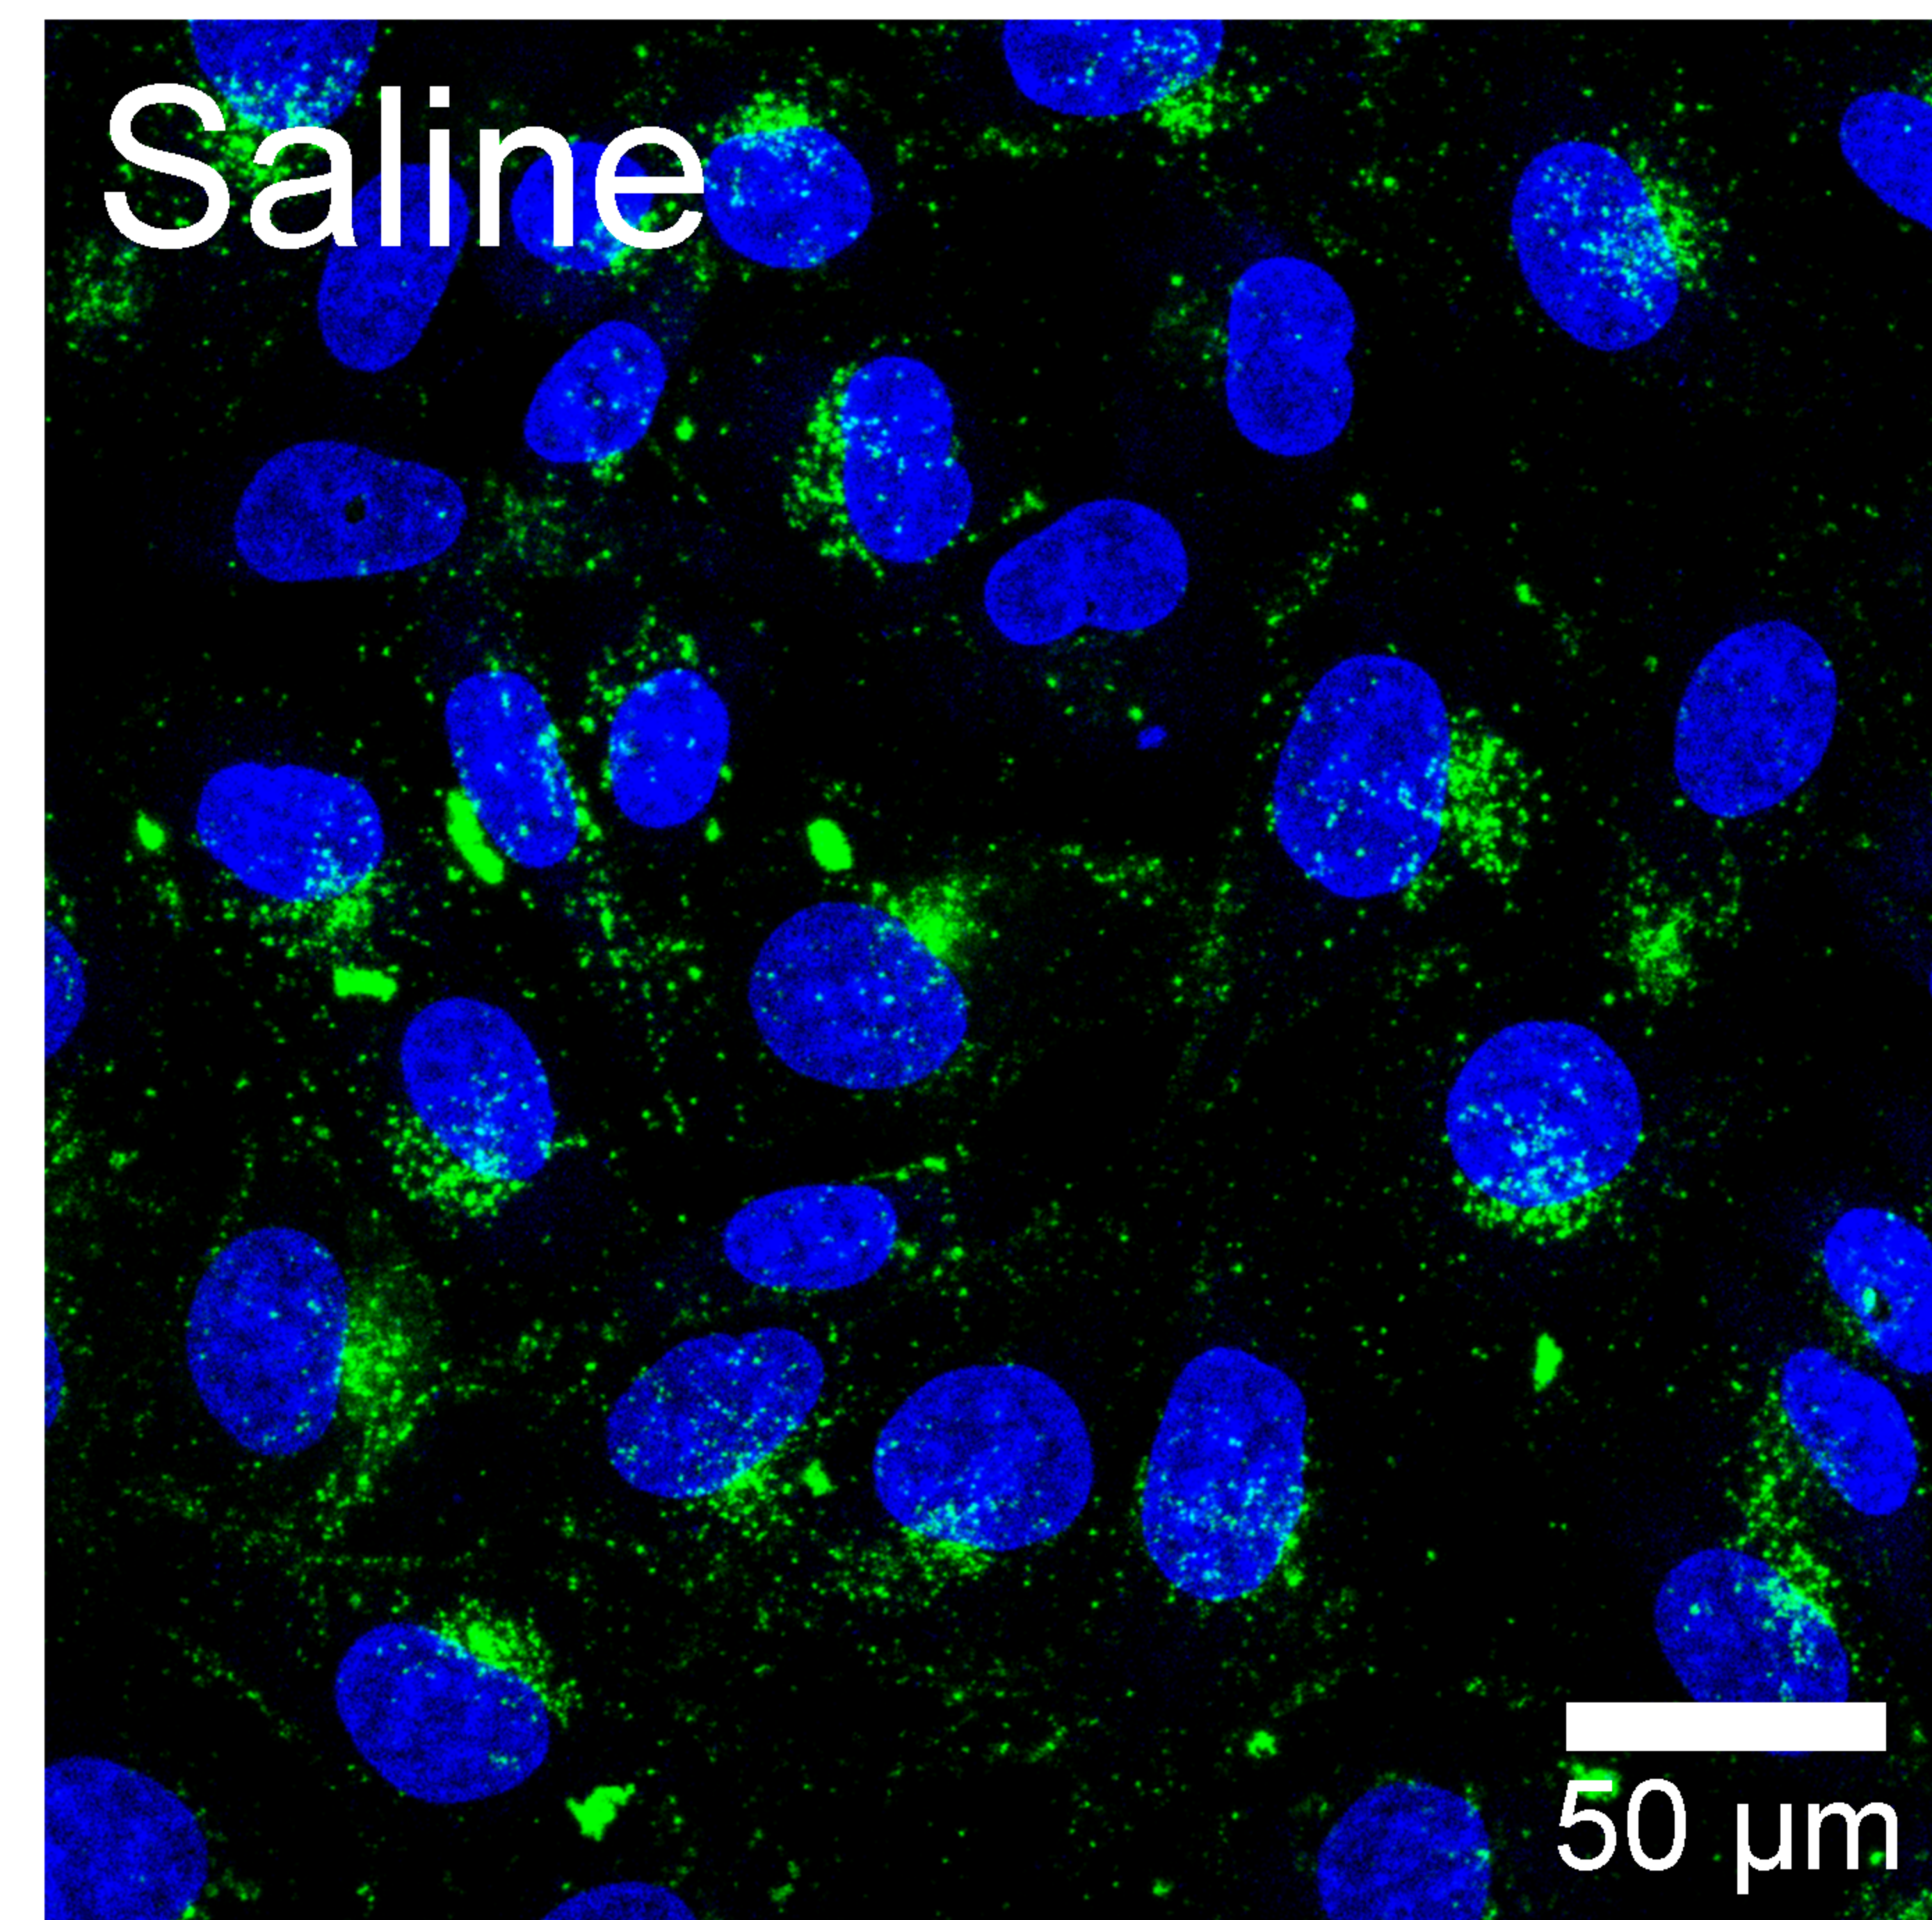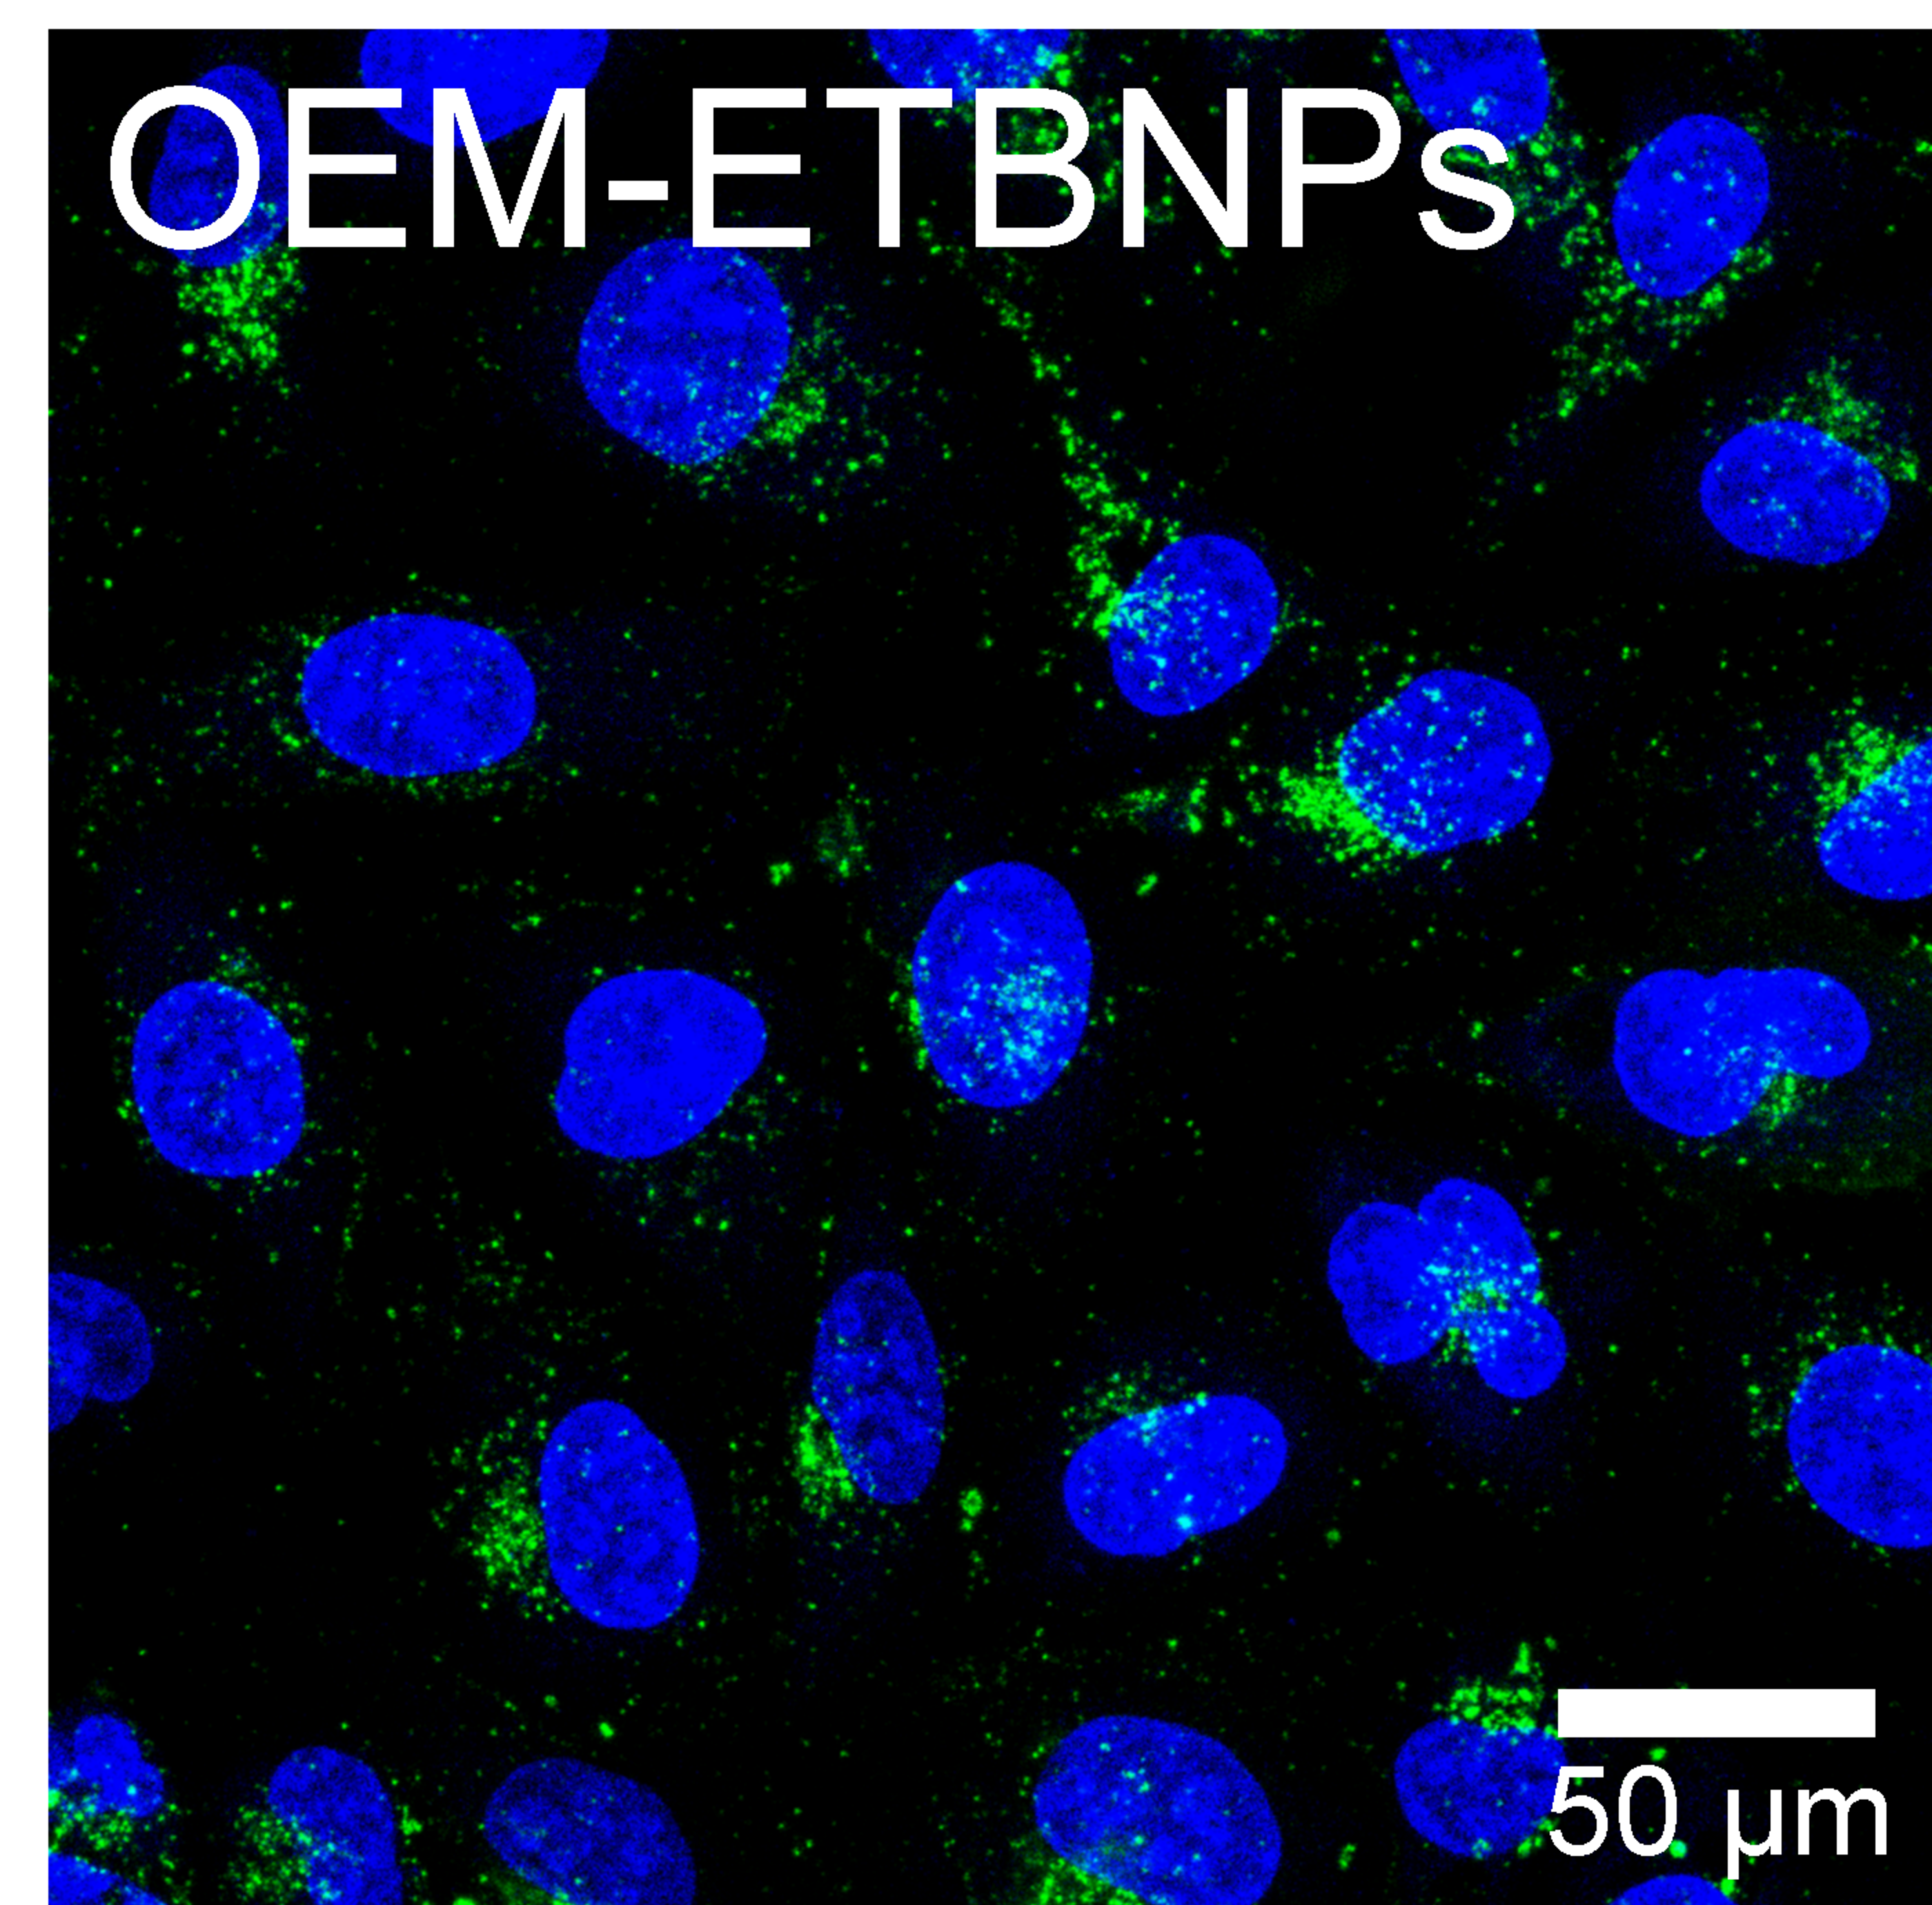

Supplement: d4sc00761a13.pdf [file d4sc00761a13.pdf]

**a**

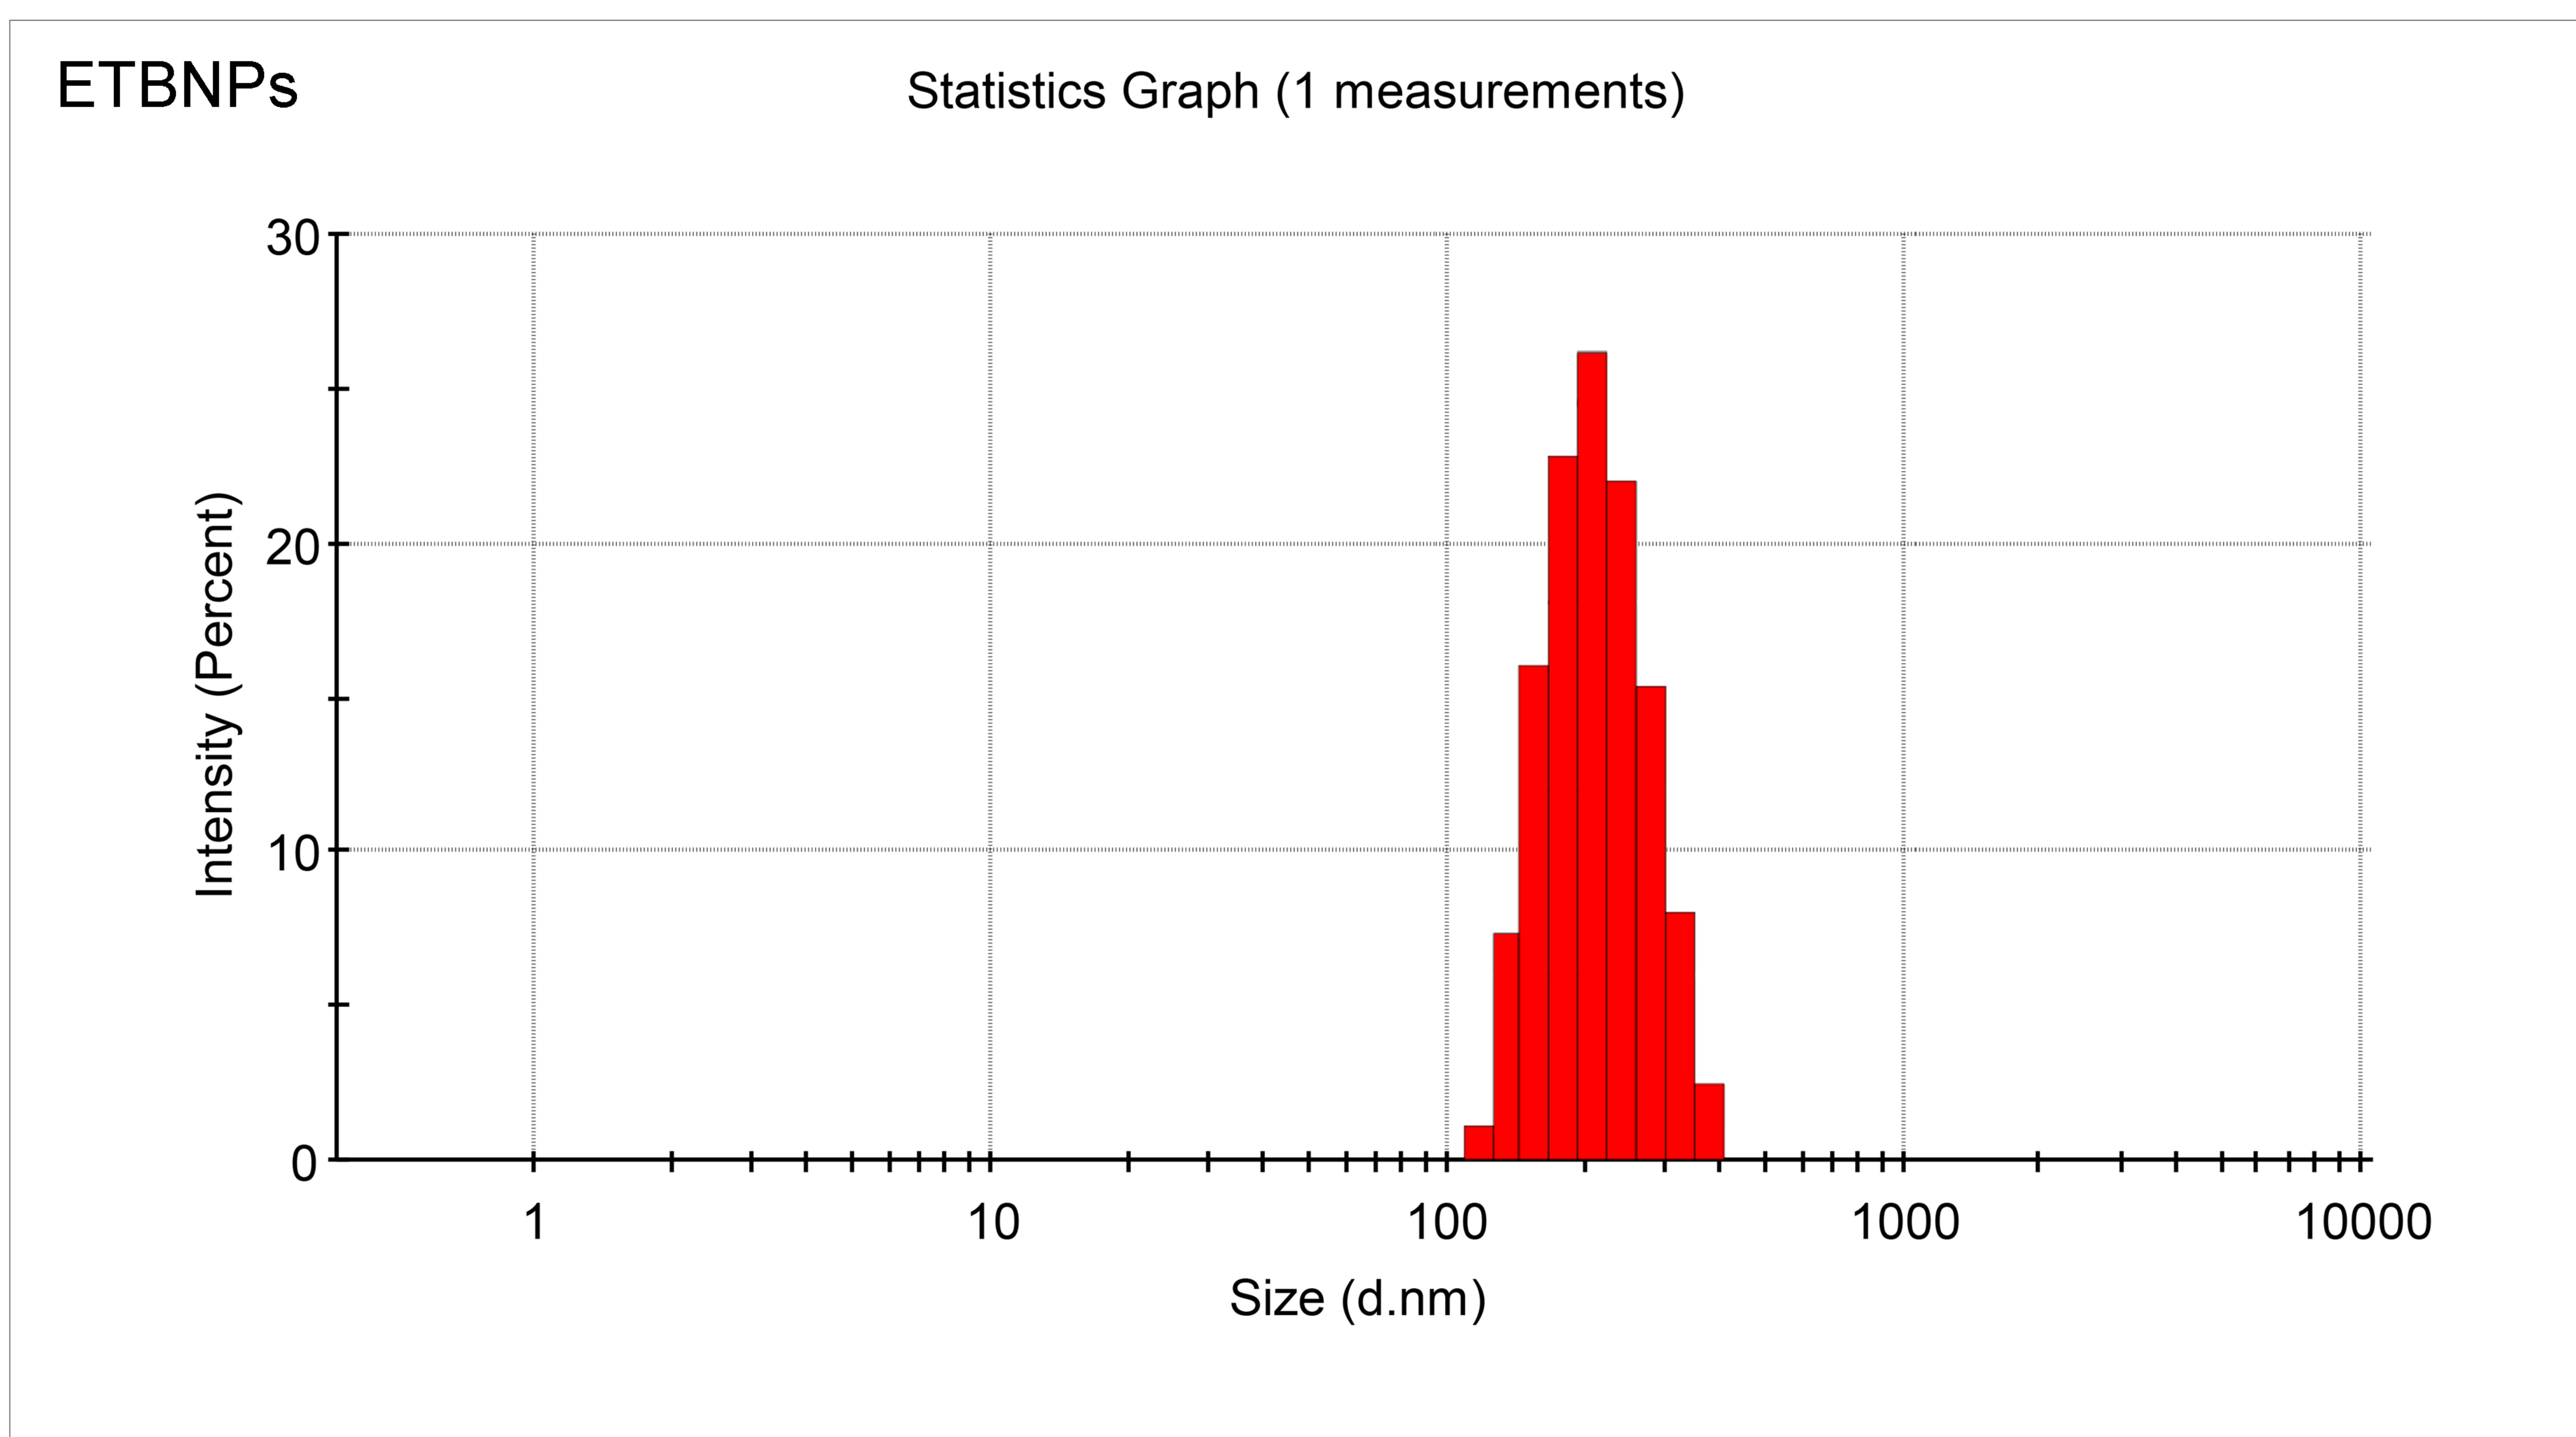

**b**

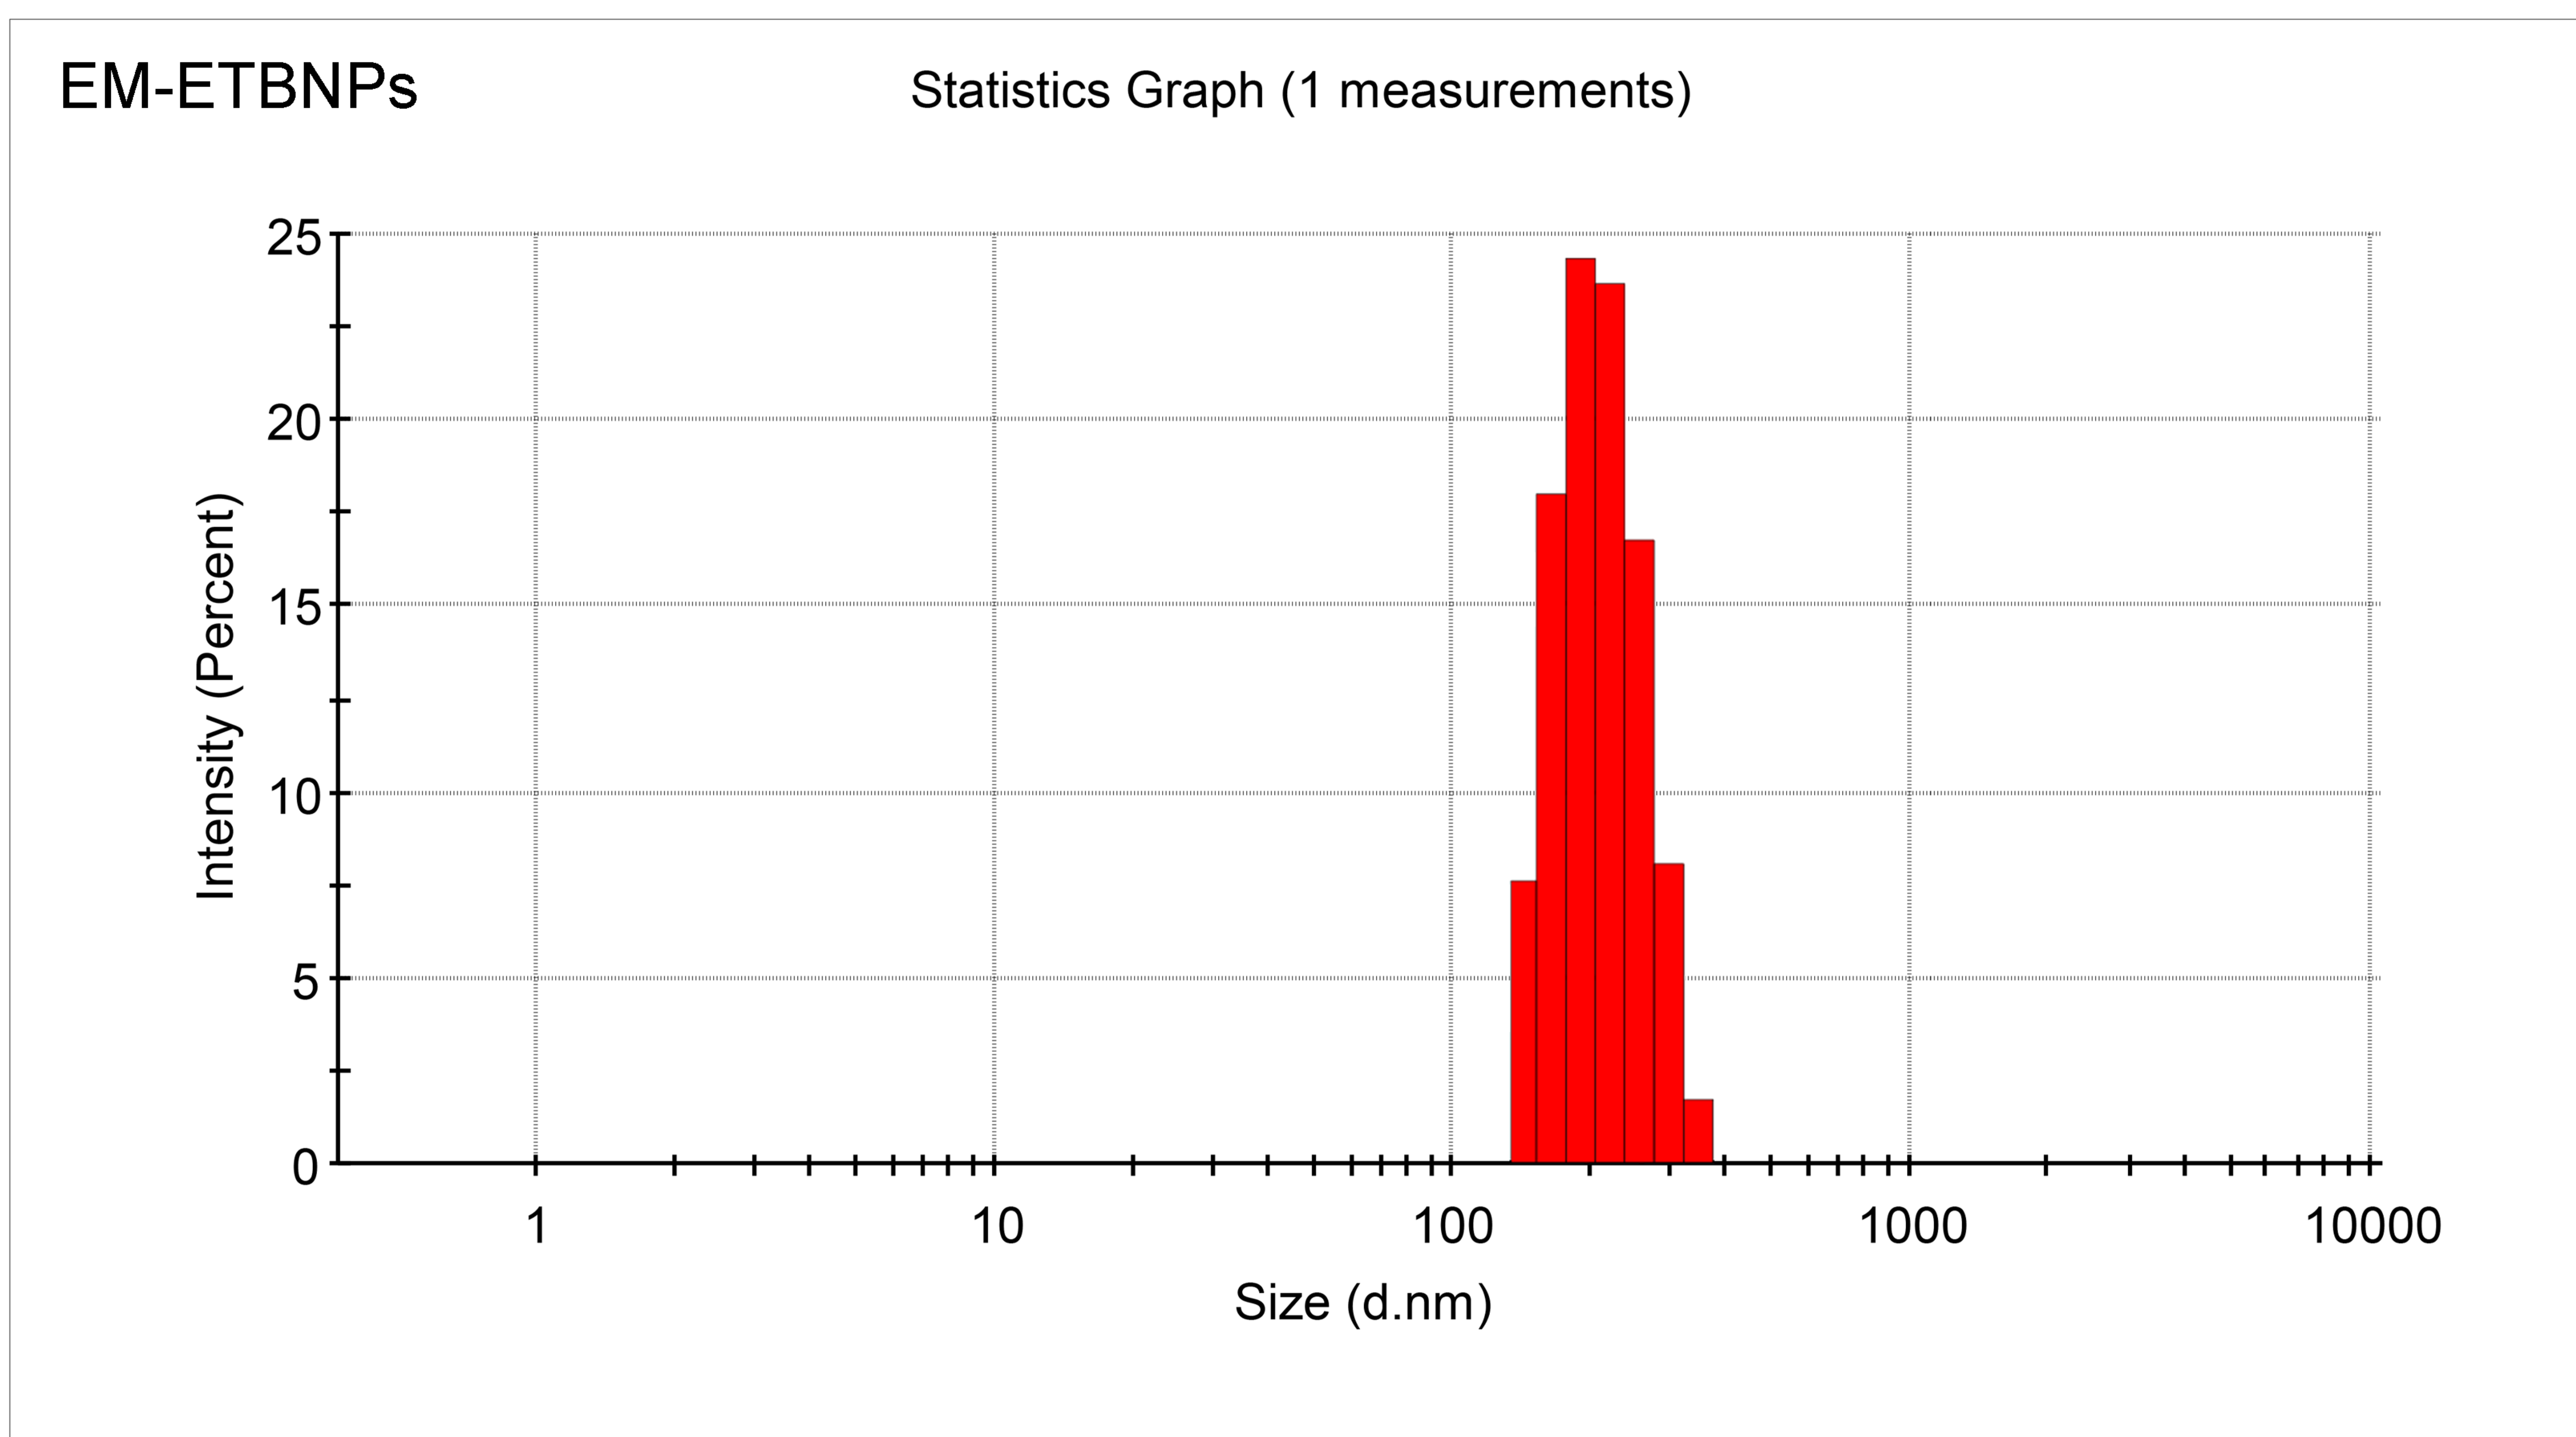

**c**

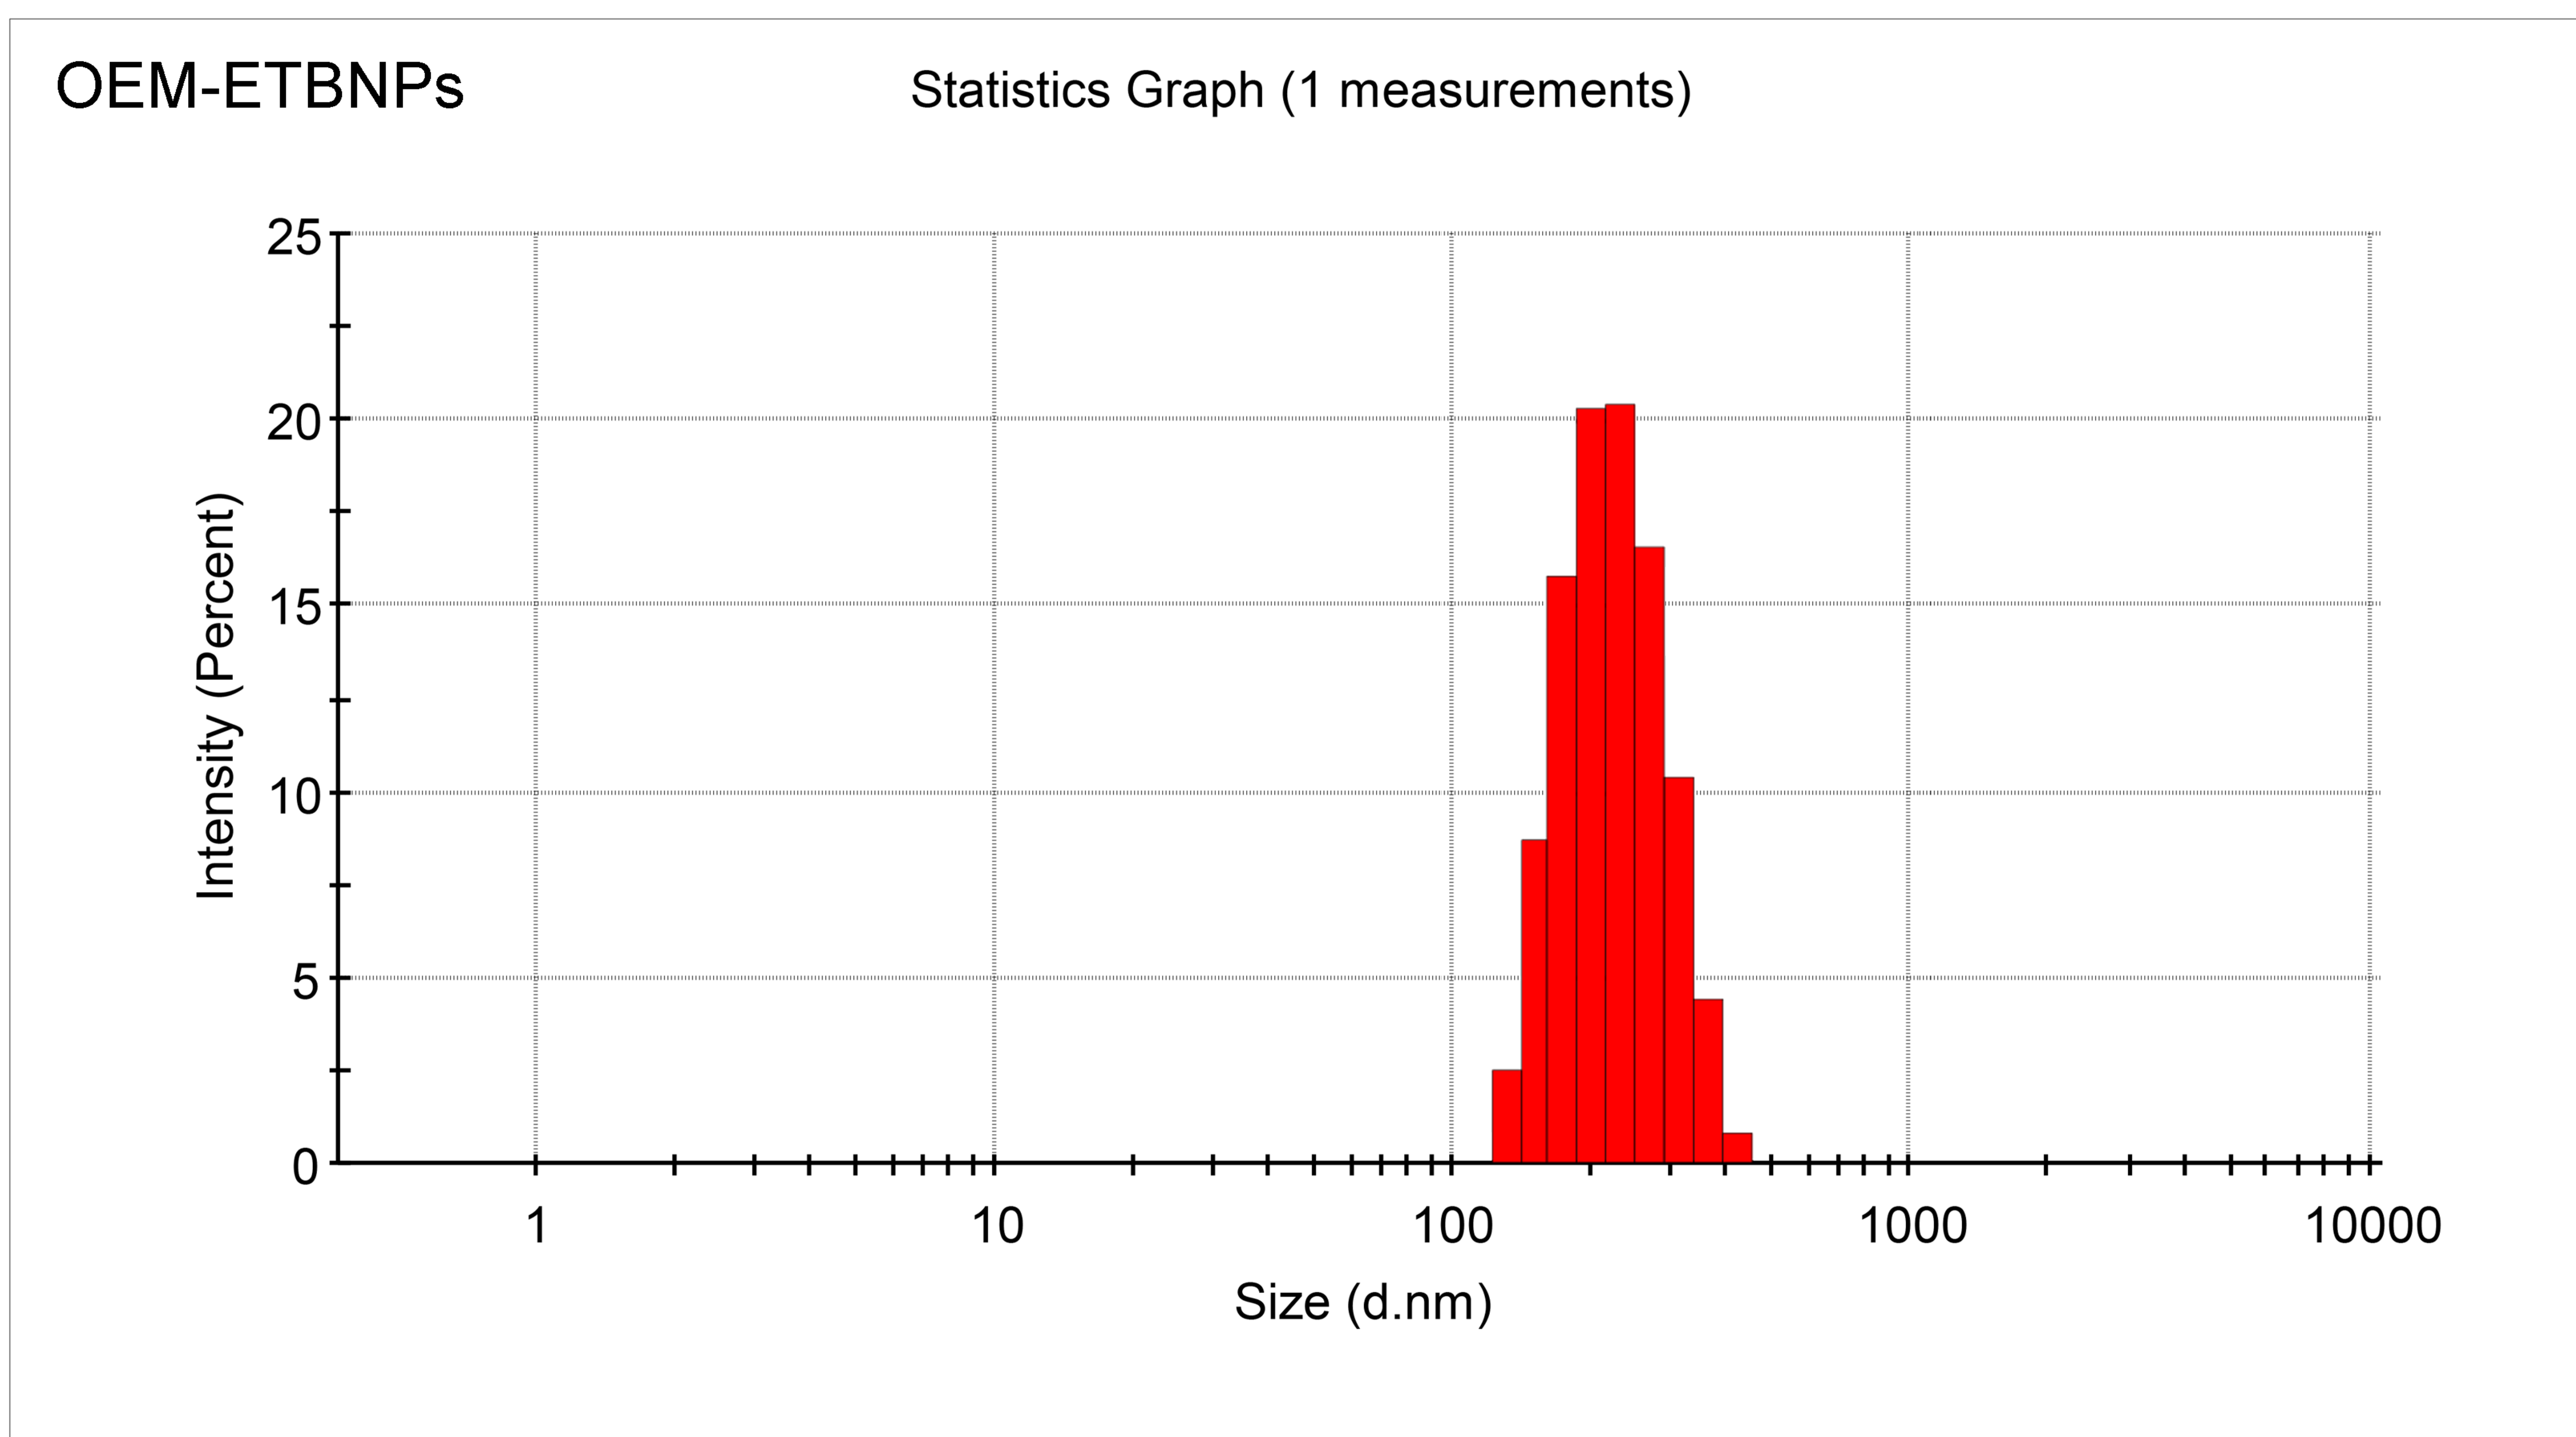

Supplement: d4sc00761a24.pdf [file d4sc00761a24.pdf]
